# Supplementary material for: Laboratory validation of a simplified DNA extraction protocol followed by a portable qPCR detection of M. tuberculosis DNA suitable for point of care settings
Source: PubMed Central journal article supplement (PMC11649121; doi:10.1371/journal.pone.0302345), 2024-12-16
Supplement: pone.0302345.s001.pdf [file pone.0302345.s001.pdf]

**S1. Table 1. Results table for Venn diagram construction calculations.**

**Description: 1=positive 0= negative**

| <b>Samples</b> | <b>Sonication<br/>(Protocol<br/>1)</b> | <b>Card FTA<br/>elute<br/>(Protocol 2)</b> | <b>GeneXpert<br/>MTB/RIF</b> | <b>Culture<br/>(gold<br/>standard)</b> |
|----------------|----------------------------------------|--------------------------------------------|------------------------------|----------------------------------------|
| 1              | 0                                      | 0                                          | 0                            | 0                                      |
| 2              | 0                                      | 0                                          | 0                            | 0                                      |
| 3              | 0                                      | 0                                          | 0                            | 0                                      |
| 4              | 1                                      | 1                                          | 1                            | 1                                      |
| 5              | 0                                      | 0                                          | 0                            | 0                                      |
| 6              | 0                                      | 0                                          | 0                            | 0                                      |
| 7              | 0                                      | 0                                          | 0                            | 0                                      |
| 8              | 0                                      | 0                                          | 0                            | 0                                      |
| 9              | 0                                      | 0                                          | 0                            | 0                                      |
| 10             | 0                                      | 0                                          | 0                            | 0                                      |
| 11             | 0                                      | 0                                          | 0                            | 0                                      |
| 12             | 0                                      | 0                                          | 0                            | 0                                      |
| 13             | 0                                      | 0                                          | 0                            | 0                                      |
| 14             | 0                                      | 0                                          | 0                            | 0                                      |
| 15             | 0                                      | 0                                          | 0                            | 0                                      |
| 16             | 0                                      | 0                                          | 1                            | 0                                      |
| 17             | 1                                      | 1                                          | 1                            | 1                                      |
| 18             | 1                                      | 1                                          | 1                            | 1                                      |
| 19             | 1                                      | 1                                          | 1                            | 1                                      |
| 20             | 0                                      | 1                                          | 1                            | 1                                      |
| 21             | 0                                      | 0                                          | 1                            | 0                                      |
| 22             | 1                                      | 0                                          | 1                            | 0                                      |
| 23             | 1                                      | 1                                          | 1                            | 1                                      |
| 24             | 0                                      | 0                                          | 0                            | 0                                      |
| 25             | 1                                      | 1                                          | 1                            | 1                                      |
| 26             | 1                                      | 1                                          | 1                            | 1                                      |

|    |   |   |   |   |
|----|---|---|---|---|
| 27 | 1 | 1 | 1 | 1 |
| 28 | 0 | 1 | 1 | 1 |
| 29 | 1 | 1 | 1 | 1 |

## SCRIPT

```
library(VennDiagram)
```

```
library(readxl)
```

```
# Load the data from the Excel file as a dataframe
```

```
tb_df <-
```

```
read_xlsx("/home/cdctserver/Downloads/diagramVenn/diagramaVenn(new).xlsx", sheet  
= "Planilha1")
```

```
sets_list <- list(
```

```
  "GeneXpert" = which(tb_df$GeneXpert == 1),
```

```
  "Culture" = which(tb_df$Culture == 1),
```

```
  "Q3" = which(tb_df$Q3 == 1),
```

```
  "CaseTB" = which(tb_df$CaseTB == 1)
```

```
)
```

```
# Create the Venn diagram
```

```
venn.plot <- venn.diagram(
```

```
  x = sets_list,
```

```
  #category.names = c("GeneXpert", "Culture", "Q3", "CaseTB"),
```

```
  filename = NULL,
```

```
  imagetype = "png",
```

```
  category.cex = 2,
```

```
category.fontface = "bold",
#category.fontfamily = "sans",
category.names.fontsize = 20, # Change the font size of groups
lwd = 1,
col = "transparent",
cat.col = "black",
cat.cex = 2, # Categories font size
#cat.fontfamily = "sans", # Fonte padr?o ("sans")
cat.fontface = "plain", # Sem negrito
fill = c("#77DD77", "#ADD8E6", "#FFFF99", "#9370DB"),
cex = 2
)

# Gets the current working directory
getwd()

# Sets the working directory to the desired location
setwd("/home/cdctserver/Downloads/diagramVenn")

# Saves the file to the specified directory
png("venn_plot_new.png", width = 1800, height = 950)
grid.draw(venn.plot)
dev.off() # Closes the graphics device and saves the plot as a PNG file
```
