# Supplementary material for: Laboratory validation of a simplified DNA extraction protocol followed by a portable qPCR detection of M. tuberculosis DNA suitable for point of care settings
Source: PubMed Central journal article supplement (PMC11649121; doi:10.1371/journal.pone.0302345), 2024-12-16
Supplement: pone.0302345.s002.pdf [file pone.0302345.s002.pdf]

**S2. Table 2. Data used to calculate the averages presented on Table 3.**

| Dilution         | CFU |     | Applied Biosystems |      |      | Q3-Plus |       |       |
|------------------|-----|-----|--------------------|------|------|---------|-------|-------|
|                  |     |     | StepOne™           |      |      |         |       |       |
| 10 <sup>-1</sup> | UNC | UNC | 23.8               | 23.8 | 23.6 | 30.08   | 25.46 | 24.81 |
|                  |     |     | 23.7               | 23.6 | 23.8 | 25      | 24.68 | 25.68 |
| 10 <sup>-2</sup> | 150 | 200 | 30.9               | 29.1 | 29.3 | 27.8    | 28.16 | 27.31 |
|                  |     |     | 29                 | 29   | 29.3 | 27,14   | 27,72 | 28,11 |
| 10 <sup>-3</sup> | 40  | 31  | 31.4               | 31.3 | 31.4 | 28.94   | 28.72 | 28.55 |
|                  |     |     | 31.4               | 31.6 | 31.6 | 28.9    | 28.8  | 30.86 |
| 10 <sup>-4</sup> | 5   | 14  | 32.8               | 33.1 | 35.7 | 32.53   | 0     | 31.02 |
|                  |     |     | 32.7               | 33.1 | 32.6 | 32,02   | 32,12 | 33,02 |
| 10 <sup>-5</sup> | 1   | 0   | 35.9               | 35.3 | 37.9 | 32.53   | 0     | 31.02 |
|                  |     |     | 37                 | 35.6 | 34.9 | 32,02   | 32,12 | 33,02 |
