# Supplementary material for: Laboratory validation of a simplified DNA extraction protocol followed by a portable qPCR detection of M. tuberculosis DNA suitable for point of care settings
Source: PubMed Central journal article supplement (PMC11649121; doi:10.1371/journal.pone.0302345), 2024-12-16
Supplement: pone.0302345.s003.pdf [file pone.0302345.s003.pdf]

**S4. Table 3. Detection Probability Q3 Plus and Step One.**

---

| Q3 PLUS       |     |       |
|---------------|-----|-------|
| Concentration | log | ct    |
| 100000        | 5   | 33.46 |
| 10000         | 4   | 32.14 |
| 1000          | 3   | 29.29 |
| 100           | 2   | 27.95 |
| 10            | 1   | 25.74 |

---

---

| Step One      |     |      |
|---------------|-----|------|
| Concentration | log | ct   |
| 100000        | 5   | 36.1 |
| 10000         | 4   | 33.3 |
| 1000          | 3   | 31.5 |
| 100           | 2   | 29.4 |
| 10            | 1   | 23.7 |

---
