# Supplementary material for: Laboratory validation of a simplified DNA extraction protocol followed by a portable qPCR detection of M. tuberculosis DNA suitable for point of care settings
Source: PubMed Central journal article supplement (PMC11649121; doi:10.1371/journal.pone.0302345), 2024-12-16
Supplement: pone.0302345.s004.pdf [file pone.0302345.s004.pdf]

**S5. Table 4. Correlation between Q3 Plus and GeneXpert Ultra semiquantitative results.**

| GeneXpert Ultra<br>Results | Q3 Plus  |          | Retest | Total |
|----------------------------|----------|----------|--------|-------|
|                            | Positive | Negative |        |       |
| Negative                   | 7        | 30       | 16     | 53    |
| Positive trace             | 1        | 3        | 2      | 6     |
| Positive very low          | 1        | 1        | 3      | 5     |
| Positive low               | 1        | 2        | 2      | 5     |
| Positive medium            | 4        | 0        | 2      | 6     |
| Positive high              | 20       | 0        | 3      | 23    |
| Total                      | 34       | 36       | 28     | 98    |
