# Supplementary material for: Laboratory validation of a simplified DNA extraction protocol followed by a portable qPCR detection of M. tuberculosis DNA suitable for point of care settings
Source: PubMed Central journal article supplement (PMC11649121; doi:10.1371/journal.pone.0302345), 2024-12-16
Supplement: pone.0302345.s005.pdf [file pone.0302345.s005.pdf]

**S6. Table 5. Results table for Venn diagram construction calculations.**

**Description: 1=positive 0= negative**

| <b>Sample</b> | <b>GeneXpert<br/>Ultra</b> | <b>Culture</b> | <b>Q3</b> | <b>CaseTB</b> |
|---------------|----------------------------|----------------|-----------|---------------|
| 1             | 1                          | 0              | 0         | 1             |
| 2             | 1                          | 0              | 0         | 1             |
| 3             | 1                          | 0              | 1         | 1             |
| 4             | 0                          | 0              | 0         | 0             |
| 5             | 1                          | 0              | 0         | 1             |
| 6             | 0                          | 0              | 0         | 0             |
| 7             | 0                          | 0              | 0         | 0             |
| 8             | 0                          | 0              | 0         | 0             |
| 9             | 0                          | 0              | 0         | 0             |
| 10            | 0                          | 0              | 0         | 0             |
| 11            | 1                          | 0              | 0         | 1             |
| 12            | 0                          | 0              | 0         | 0             |
| 13            | 1                          | 0              | 1         | 1             |
| 14            | 0                          | 0              | 1         | 0             |
| 15            | 1                          | 1              | 1         | 1             |
| 16            | 0                          | 0              | 0         | 0             |
| 17            | 0                          | 0              | 0         | 0             |
| 18            | 0                          | 0              | 0         | 0             |
| 19            | 0                          | 0              | 0         | 0             |
| 20            | 0                          | 0              | 0         | 0             |
| 21            | 1                          | 0              | 1         | 1             |
| 22            | 1                          | 1              | 1         | 1             |
| 23            | 1                          | 1              | 1         | 1             |
| 24            | 1                          | 0              | 1         | 1             |
| 25            | 1                          | 1              | 1         | 1             |
| 26            | 1                          | 0              | 0         | 1             |
| 27            | 1                          | 1              | 1         | 1             |
| 28            | 0                          | 0              | 0         | 0             |
| 29            | 0                          | 0              | 0         | 0             |
| 30            | 1                          | 1              | 1         | 1             |
| 31            | 1                          | 1              | 1         | 1             |
| 32            | 0                          | 0              | 0         | 1             |
| 33            | 0                          | 0              | 0         | 0             |
| 34            | 0                          | 0              | 0         | 0             |
| 35            | 0                          | 0              | 0         | 0             |
| 36            | 1                          | 0              | 1         | 1             |
| 37            | 1                          | 0              | 1         | 1             |
| 38            | 1                          | 0              | 1         | 1             |

|    |   |   |   |   |
|----|---|---|---|---|
| 39 | 1 | 0 | 1 | 1 |
| 40 | 1 | 1 | 1 | 1 |
| 41 | 1 | 0 | 1 | 1 |
| 42 | 1 | 0 | 1 | 1 |
| 43 | 0 | 0 | 1 | 1 |
| 44 | 1 | 0 | 1 | 1 |
| 45 | 0 | 0 | 1 | 0 |
| 46 | 0 | 0 | 0 | 0 |
| 47 | 1 | 0 | 0 | 1 |
| 48 | 0 | 0 | 0 | 0 |
| 49 | 1 | 0 | 1 | 1 |
| 50 | 1 | 1 | 1 | 1 |
| 51 | 1 | 0 | 1 | 1 |
| 52 | 0 | 0 | 0 | 0 |
| 53 | 0 | 0 | 0 | 0 |
| 54 | 1 | 1 | 1 | 1 |
| 55 | 0 | 0 | 0 | 0 |
| 56 | 0 | 1 | 0 | 1 |
| 57 | 1 | 0 | 1 | 1 |
| 58 | 1 | 1 | 1 | 1 |
| 59 | 1 | 0 | 1 | 1 |
| 60 | 0 | 0 | 1 | 0 |
| 61 | 0 | 0 | 1 | 0 |
| 62 | 0 | 0 | 0 | 1 |
| 63 | 0 | 0 | 1 | 0 |
| 64 | 0 | 0 | 0 | 0 |
| 65 | 1 | 1 | 1 | 1 |
| 66 | 0 | 0 | 1 | 0 |
| 67 | 0 | 0 | 0 | 0 |
| 68 | 0 | 0 | 0 | 0 |
| 69 | 0 | 0 | 0 | 0 |
| 70 | 0 | 0 | 0 | 0 |

SCRIPT

```
library(VennDiagram)
```

```
library(readxl)
```

```
# Load the data from the Excel file as a dataframe
```

```
tb_df <- read_xlsx("/home/cdctserver/Downloads/diagramVenn/diagramaVenn(new).xlsx",  
sheet = "Planilha1")
```

```
sets_list <- list(  
  "GeneXpert" = which(tb_df$GeneXpert == 1),  
  "Culture" = which(tb_df$Culture == 1),  
  "Q3" = which(tb_df$Q3 == 1),  
  "CaseTB" = which(tb_df$CaseTB == 1)  
)
```

```
# Create the Venn diagram
```

```
venn.plot <- venn.diagram(  
  x = sets_list,  
  #category.names = c("GeneXpert", "Culture", "Q3", "CaseTB"),  
  filename = NULL,  
  imagetype = "png",  
  category.cex = 2,  
  category.fontface = "bold",  
  #category.fontfamily = "sans",  
  category.names.fontsize = 20, # Change the font size of groups  
  lwd = 1,  
  col = "transparent",  
  cat.col = "black",  
  cat.cex = 2, # Categories font size  
  #cat.fontfamily = "sans", # Fonte padr?o ("sans")  
  cat.fontface = "plain", # No bold
```

```
fill = c("#77DD77", "#ADD8E6", "#FFFF99", "#9370DB"),  
cex = 2  
)  
  
# Gets the current working directory  
getwd()  
  
# Sets the working directory to the desired location  
setwd("/home/cdctserver/Downloads/diagramVenn")  
  
# Saves the file to the specified directory  
png("venn_plot_new.png", width = 1800, height = 950)  
grid.draw(venn.plot)  
dev.off() # Closes the graphics device and saves the plot as a PNG file
```
