# Supplementary material for: Laboratory validation of a simplified DNA extraction protocol followed by a portable qPCR detection of M. tuberculosis DNA suitable for point of care settings
Source: PubMed Central journal article supplement (PMC11649121; doi:10.1371/journal.pone.0302345), 2024-12-16
Supplement: pone.0302345.s006.pdf [file pone.0302345.s006.pdf]

**S3. Fig 2. Plotting graphs to determine the efficiency of Q3 plus and Step one.**

Description formula  $E = (10 - 1/\text{slope} - 1) \times 100$

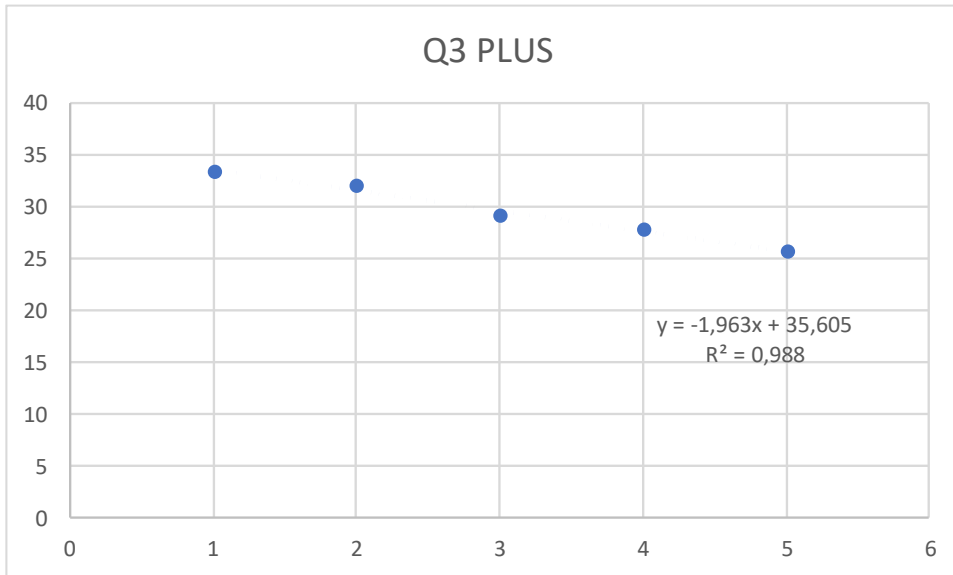

Efficiency of 216%

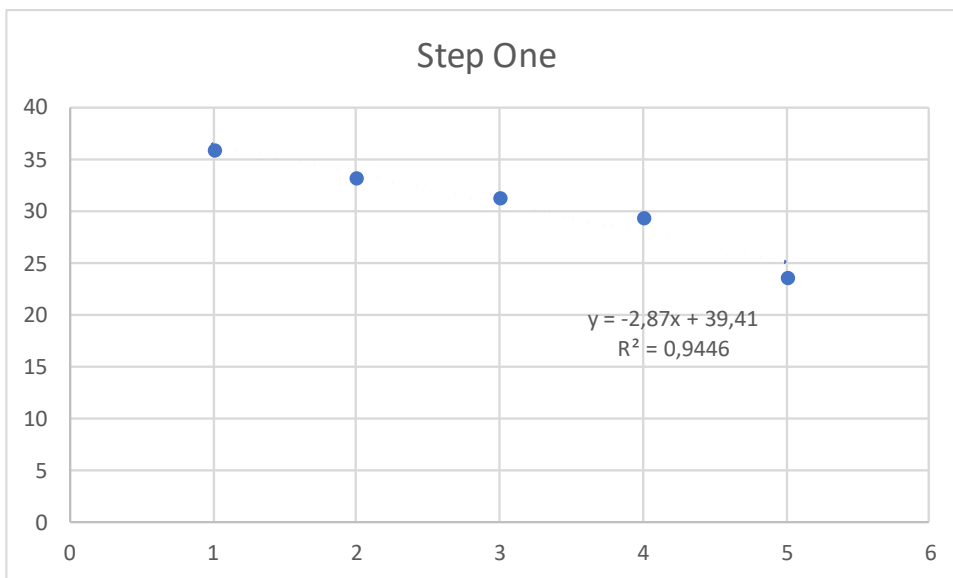

Efficiency of 118%
